# Supplementary material for: Synthetic, spectral, structural and catalytic activity of infinite 3-D and 2-D copper(ii) coordination polymers for substrate size-dependent catalysis for CO2 conversion
Source: Royal Society of Chemistry journal article supplement (doi:10.1039/c9dt01457h), 2019-01-01

## Supplementary Information

### **Synthetic, Spectral, Structural and Catalytic activity of infinite 3-D and 2-D Copper(II) Coordination Polymers for Substrate Size-Dependent Catalysis for CO<sub>2</sub> Conversion**

Bhaskaran,<sup>a</sup> Manoj Trivedi,<sup>a\*</sup> Anita K. Yadav,<sup>b</sup> Gurmeet Singh,<sup>a\*</sup> Abhinav Kumar,<sup>c</sup> Girijesh Kumar,<sup>d</sup> Ahmad Husain,<sup>e</sup> Nigam P. Rath<sup>f\*\*</sup>

<sup>a</sup>Department of Chemistry, University of Delhi, Delhi-110007, INDIA.

<sup>b</sup>Department of Chemistry, Rajdhani College, University of Delhi, Delhi-110015, INDIA

<sup>c</sup>Department of Chemistry, University of Lucknow, Lucknow-206007, INDIA

<sup>d</sup>Department of Chemistry and Center of Advanced Studies in Chemistry, Panjab University, Chandigarh-160014, INDIA

<sup>e</sup>Department of Chemistry, DAV University, Jalandhar, Punjab, INDIA

<sup>f</sup>Department of Chemistry & Biochemistry and Centre for Nanoscience, University of Missouri-St. Louis, One University Boulevard, St. Louis, MO 63121-4499, USA.

Corresponding authors: E-mail address: manojtri@gmail (M.T.); rathn@umsl.edu(NPR); gurmeet123@gmail (G.S.). Tel.: + 91 9811730475 (MT); + 91 9810390640(G.S.); (314) 516-5333 (NPR).

**Table 1.** Crystallographic data for **1** and **2**.

|                                        |                                                                               |                                                                  |
|----------------------------------------|-------------------------------------------------------------------------------|------------------------------------------------------------------|
| Empirical Formula                      | C <sub>11</sub> H <sub>18</sub> N <sub>2</sub> O <sub>8</sub> Cu <sub>2</sub> | C <sub>34</sub> H <sub>36</sub> N <sub>6</sub> O <sub>8</sub> Cu |
| FW                                     | 433.35                                                                        | 720.23                                                           |
| crystal system                         | Tetragonal                                                                    | Monoclinic                                                       |
| space group                            | <i>P4<sub>2</sub>/nnm</i>                                                     | <i>P2<sub>1</sub>/c</i>                                          |
| a, Å                                   | 10.8365(15)                                                                   | 16.4200(14)                                                      |
| b, Å                                   | 10.8365(15)                                                                   | 8.2055(7)                                                        |
| c, Å                                   | 13.6420(3)                                                                    | 12.2480(10)                                                      |
| α, deg                                 | 90                                                                            | 90                                                               |
| β, deg                                 | 90                                                                            | 110.921(3)                                                       |
| γ, deg                                 | 90                                                                            | 90                                                               |
| V, Å <sup>3</sup>                      | 1602.0(5)                                                                     | 1541.4(2)                                                        |
| Z                                      | 4                                                                             | 2                                                                |
| d <sub>calc</sub> , g cm <sup>-3</sup> | 1.797                                                                         | 1.552                                                            |
| μ, mm <sup>-1</sup>                    | 2.696                                                                         | 0.775                                                            |
| T, K                                   | 293(2)                                                                        | 100(2)                                                           |
| R <sub>1</sub> all                     | 0.0841                                                                        | 0.0604                                                           |
| R <sub>1</sub> [I > 2σ(I)]             | 0.0687                                                                        | 0.0413                                                           |
| wR <sub>2</sub>                        | 0.1788                                                                        | 0.1179                                                           |
| wR <sub>2</sub> [I > 2σ(I)]            | 0.1721                                                                        | 0.1071                                                           |
| GOF on F <sup>2</sup>                  | 1.234                                                                         | 1.046                                                            |

$$^aR_1 = \sum||F_o| - |F_c||/\sum|F_o|; wR_2 = \{\sum[w(|F_o|^2 - |F_c|^2)^2]/\sum[wF_o,4]\}^{1/2}.$$

**Table 2.** Selected bond lengths (Å), and bond angles (°) for **1** and **2**.

| <b>Compound 1</b>                            |            | <b>Compound 2</b>                            |            |
|----------------------------------------------|------------|----------------------------------------------|------------|
| Cu(1)-O(1) <sup>#1</sup>                     | 1.945(5)   | Cu(1)-O(1) <sup>#1</sup>                     | 1.9420(16) |
| Cu(1)-O(1)                                   | 1.945(5)   | Cu(1)-O(1)                                   | 1.9420(16) |
| Cu(1)-O(2) <sup>#2</sup>                     | 1.965(5)   | Cu(1)-O(3) <sup>#2</sup>                     | 1.9534(16) |
| Cu(1)-O(2) <sup>#3</sup>                     | 1.965(5)   | Cu(1)-O(3) <sup>#3</sup>                     | 1.9535(16) |
| Cu(1)-N(1)                                   | 2.343(6)   | O(1)-C(1)                                    | 1.279(3)   |
| Cu(1)-Cu(1) <sup>#2</sup>                    | 2.6317(19) | O(2)-C(1)                                    | 1.241(3)   |
| O(1)-C(1)                                    | 1.249(8)   | O(3)-C(8)                                    | 1.268(3)   |
| O(2)-C(1)                                    | 1.265(8)   | O(4)-C(8)                                    | 1.250(3)   |
| O(2)-Cu(1) <sup>#2</sup>                     | 1.965(5)   | N(1)-C(9)                                    | 1.493(3)   |
| N(1)-C(4) <sup>#4</sup>                      | 1.477(5)   | N(1)-C(12)                                   | 1.501(3)   |
| N(1)-C(4)                                    | 1.477(5)   | N(2)-C(13)                                   | 1.362(3)   |
| N(1)-C(3)                                    | 1.479(9)   | N(2)-C(11)                                   | 1.458(3)   |
| C(1)-C(2)                                    | 1.499(9)   | N(2)-C(10)                                   | 1.460(3)   |
| C(3)-N(1) <sup>#5</sup>                      | 1.479(9)   | N(3)-C(17)                                   | 1.334(3)   |
| C(4)-N(1) <sup>#6</sup>                      | 1.477(5)   | N(3)-C(13)                                   | 1.354(3)   |
| O(1) <sup>#1</sup> -Cu(1)-O(1)               | 91.4(4)    | O(1) <sup>#1</sup> -Cu(1)-O(1)               | 180.0      |
| O(1) <sup>#1</sup> -Cu(1)-O(2) <sup>#2</sup> | 87.4(2)    | O(1) <sup>#1</sup> -Cu(1)-O(3) <sup>#2</sup> | 86.98(7)   |
| O(1)-Cu(1)-O(2) <sup>#2</sup>                | 168.0(2)   | O(1)-Cu(1)-O(3) <sup>#2</sup>                | 93.02(7)   |
| O(1) <sup>#1</sup> -Cu(1)-O(2) <sup>#3</sup> | 168.0(2)   | O(1) <sup>#1</sup> -Cu(1)-O(3) <sup>#3</sup> | 93.02(7)   |
| O(1)-Cu(1)-O(2) <sup>#3</sup>                | 87.4(2)    | O(1)-Cu(1)-O(3) <sup>#3</sup>                | 86.98(7)   |
| O(2) <sup>#2</sup> -Cu(1)-O(2) <sup>#3</sup> | 91.2(3)    | O(3) <sup>#2</sup> -Cu(1)-O(3) <sup>#3</sup> | 180.0      |
| O(1) <sup>#1</sup> -Cu(1)-N(1)               | 99.37(18)  | C(1)-O(1)-Cu(1)                              | 118.48(14) |
| O(1)-Cu(1)-N(1)                              | 99.37(18)  | C(8)-O(3)-Cu(1) <sup>#4</sup>                | 110.10(14) |
| O(2) <sup>#2</sup> -Cu(1)-N(1)               | 92.60(18)  | O(2)-C(1)-O(1)                               | 127.2(2)   |
| O(2) <sup>#3</sup> -Cu(1)-N(1)               | 92.60(18)  | O(2)-C(1)-C(2)                               | 116.83(19) |

|                                               |            |                  |            |
|-----------------------------------------------|------------|------------------|------------|
| O(1) <sup>#1</sup> -Cu(1)-Cu(1) <sup>#2</sup> | 85.09(15)  | O(1)-C(1)-C(2)   | 115.83(19) |
| O(2) <sup>#2</sup> -Cu(1)-Cu(1) <sup>#2</sup> | 82.91(15)  | O(4)-C(8)-O(3)   | 124.9(2)   |
| N(1)-Cu(1)-Cu(1) <sup>#2</sup>                | 173.56(17) | O(4)-C(8)-C(3)   | 118.00(19) |
| C(1)-O(1)-Cu(1)                               | 123.1(4)   | O(3)-C(8)-C(3)   | 116.99(19) |
| C(1)-O(2)-Cu(1) <sup>#2</sup>                 | 124.2(4)   | C(9)-N(1)-C(12)  | 112.79(18) |
| C(4)-N(1)-Cu(1)                               | 113.4(3)   | C(13)-N(2)-C(11) | 123.21(19) |
| C(3)-N(1)-Cu(1)                               | 103.5(4)   | C(13)-N(2)-C(10) | 122.92(19) |
| O(1)-C(1)-O(2)                                | 124.3(6)   | C(11)-N(2)-C(10) | 113.33(18) |
| O(1)-C(1)-C(2)                                | 119.0(6)   | C(17)-N(3)-C(13) | 115.9(2)   |
| O(2)-C(1)-C(2)                                | 116.7(6)   | N(1)-C(9)-C(10)  | 110.51(19) |
| N(1)-C(3)-N(1) <sup>#5</sup>                  | 111.1(8)   | N(2)-C(10)-C(9)  | 109.37(19) |
| N(1)-C(4)-N(1) <sup>#6</sup>                  | 110.7(7)   | N(2)-C(11)-C(12) | 110.66(19) |
|                                               |            | N(1)-C(12)-C(11) | 111.56(19) |
|                                               |            | N(3)-C(13)-N(2)  | 116.9(2)   |

**Table 3.** Hydrogen bond parameters for **1** and **2**.

| D-H...A-X                                                                                                                                                                                                               | <i>d</i> H...A Å | <i>D</i> D...A Å | $\theta$ D-H...A° |
|-------------------------------------------------------------------------------------------------------------------------------------------------------------------------------------------------------------------------|------------------|------------------|-------------------|
| <b>Compound 1</b>                                                                                                                                                                                                       |                  |                  |                   |
| C(3)-H(3A)...O(2) <sup>a</sup>                                                                                                                                                                                          | 2.52             | 3.112(8)         | 119               |
| C(3)-H(3B)...O(2) <sup>b</sup>                                                                                                                                                                                          | 2.52             | 3.112(8)         | 119               |
| Symmetry transformations used to generate equivalent atoms: (a) -1+y,x,-z: -x,1-y,-z;<br>(b) 1/2-y,1/2-x,-z:-1/2+ x,-1/2+y,-z.                                                                                          |                  |                  |                   |
| <b>Compound 2</b>                                                                                                                                                                                                       |                  |                  |                   |
| C(9)-H(9A)...O(1) <sup>#1</sup>                                                                                                                                                                                         | 2.46             | 3.431(3)         | 167.4             |
| C(11)-H(11A)...N(3) <sup>#5</sup>                                                                                                                                                                                       | 2.63             | 3.514(3)         | 149.2             |
| C(12)-H(12A)...O(1) <sup>#4</sup>                                                                                                                                                                                       | 2.59             | 3.535(3)         | 158.7             |
| C(12)-H(12B)...O(3) <sup>#2</sup>                                                                                                                                                                                       | 2.27             | 3.130(3)         | 144.9             |
| N(1)-H(1A)...O(4) <sup>#4</sup>                                                                                                                                                                                         | 1.88(4)          | 2.761(3)         | 164(3)            |
| N(1)-H(1B)...O(2)                                                                                                                                                                                                       | 1.80(3)          | 2.690(3)         | 168(3)            |
| Symmetry transformations used to generate equivalent atoms: <sup>#1</sup> -x+1,-y+1,-z+1; <sup>#2</sup> -x+1,y-1/2,-z+1/2; <sup>#3</sup> x,-y+3/2,z+1/2; <sup>#4</sup> -x+1,y+1/2,-z+1/2; <sup>#5</sup> x,-y+3/2,z-1/2. |                  |                  |                   |

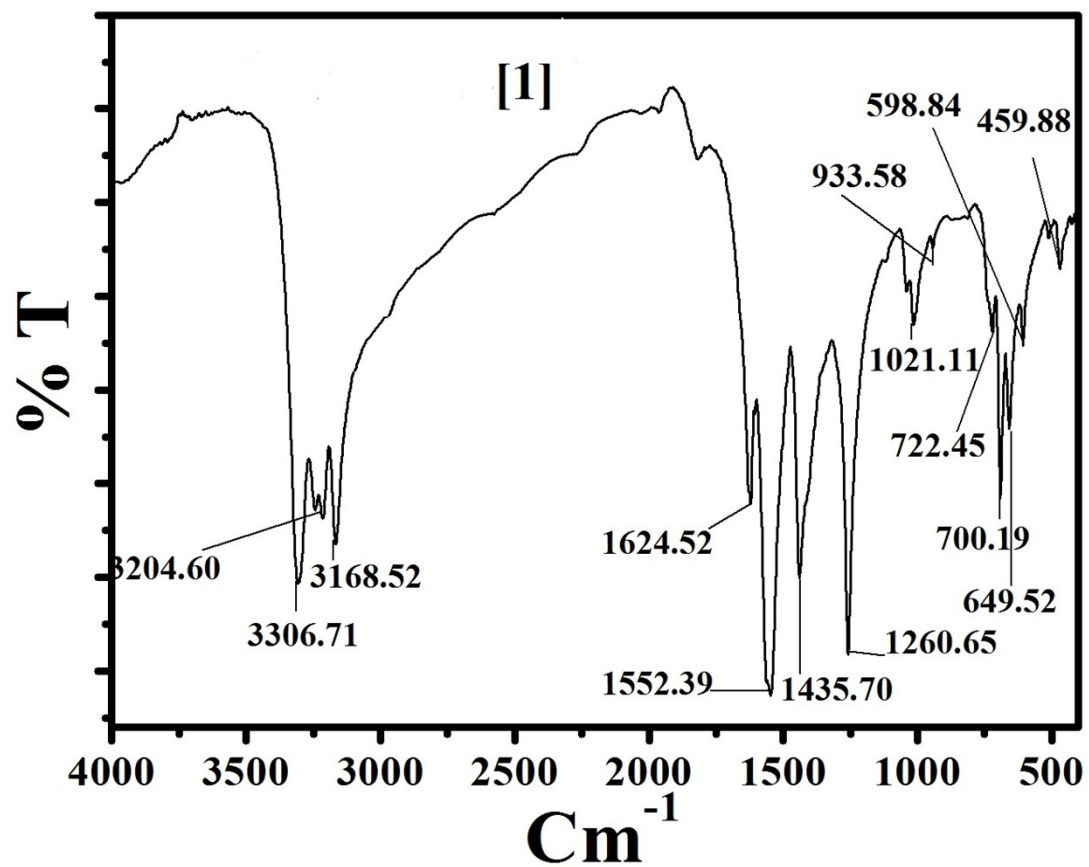

Figure S1. Infrared spectrum of 1.

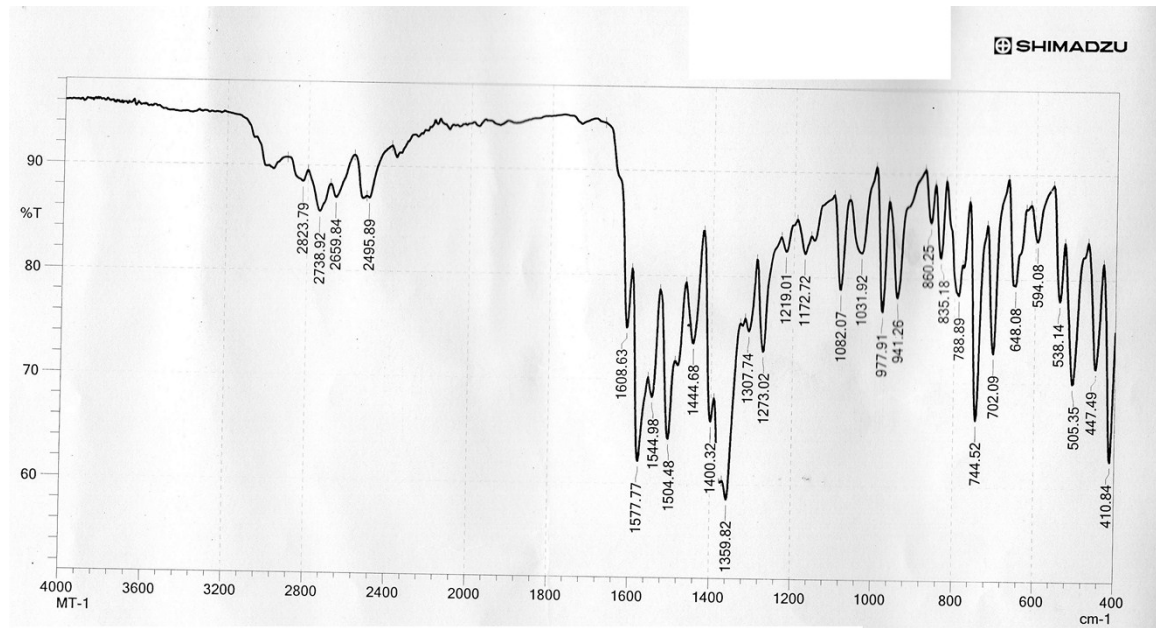

**Figure S2.** Infrared spectrum of **2**.

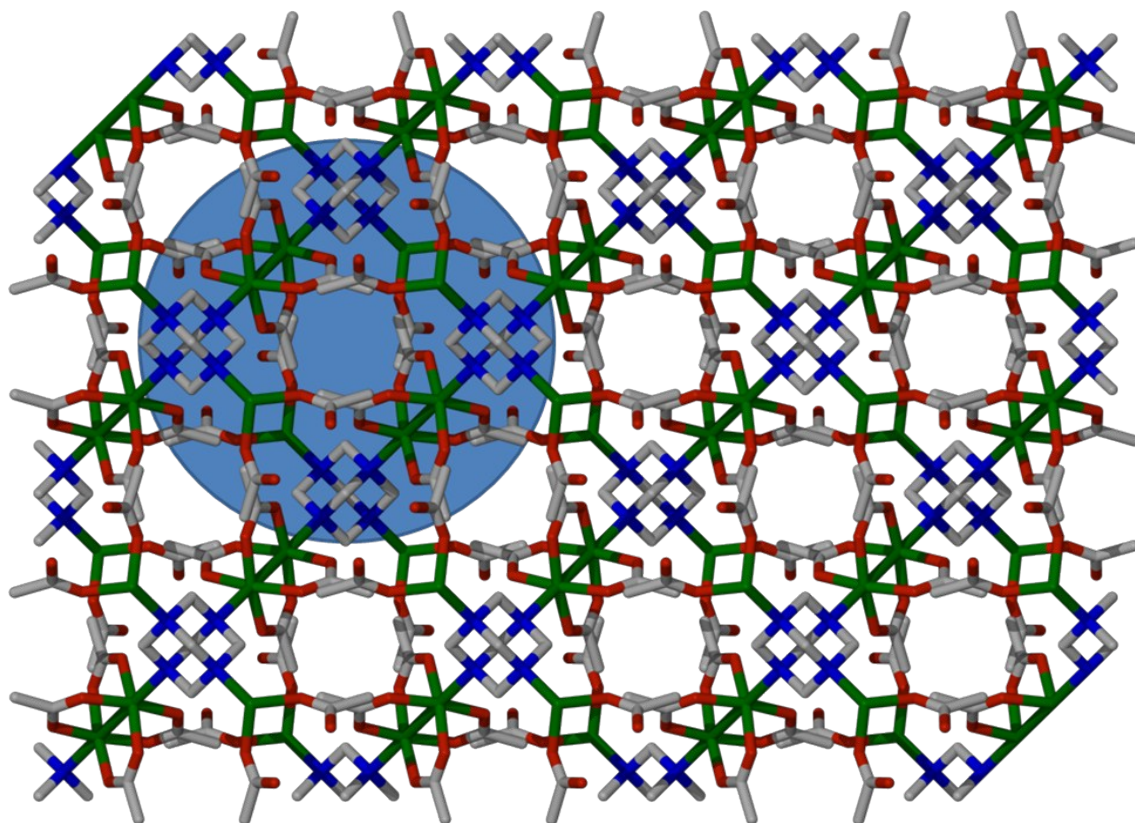

**Figure S3.**Six-membered ring in compound 1.



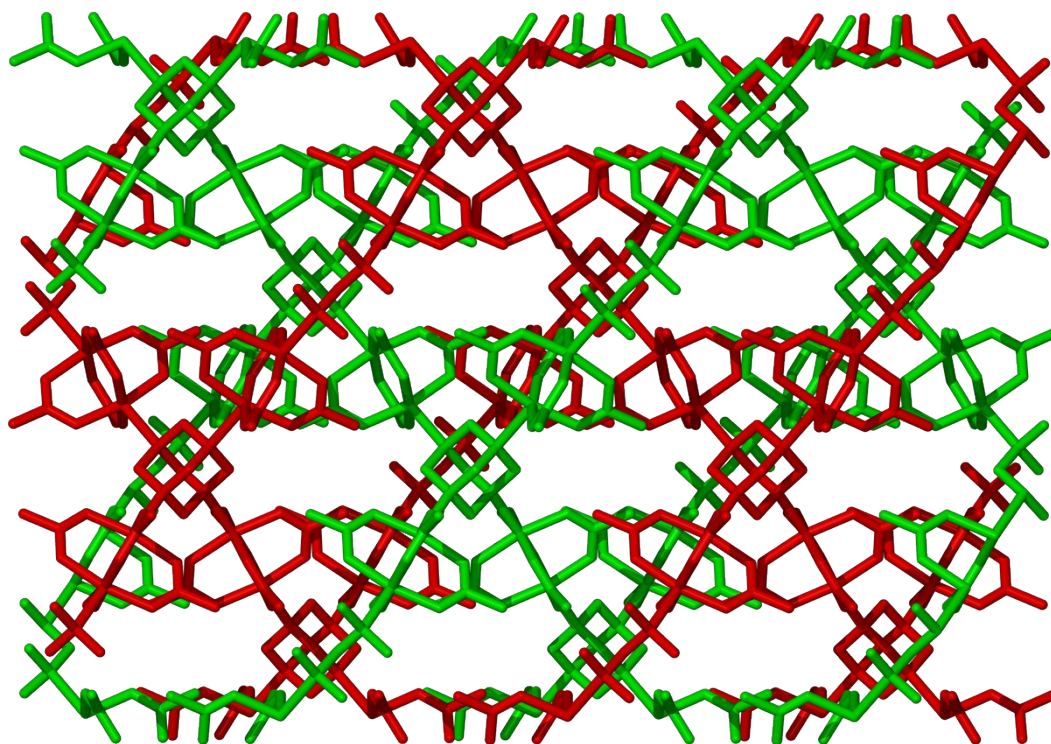

**Figure S4.** 2-fold interpenetrated network in **1**.

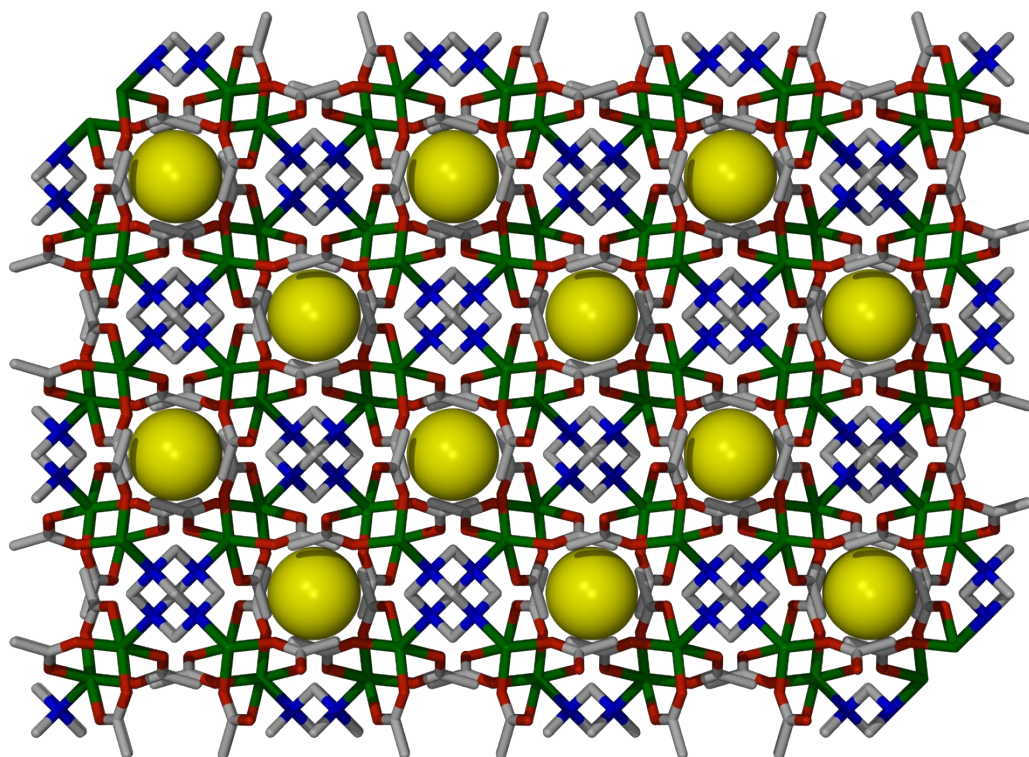

**Figure S5.** Channels formed along  $c$ -axis in **1**.

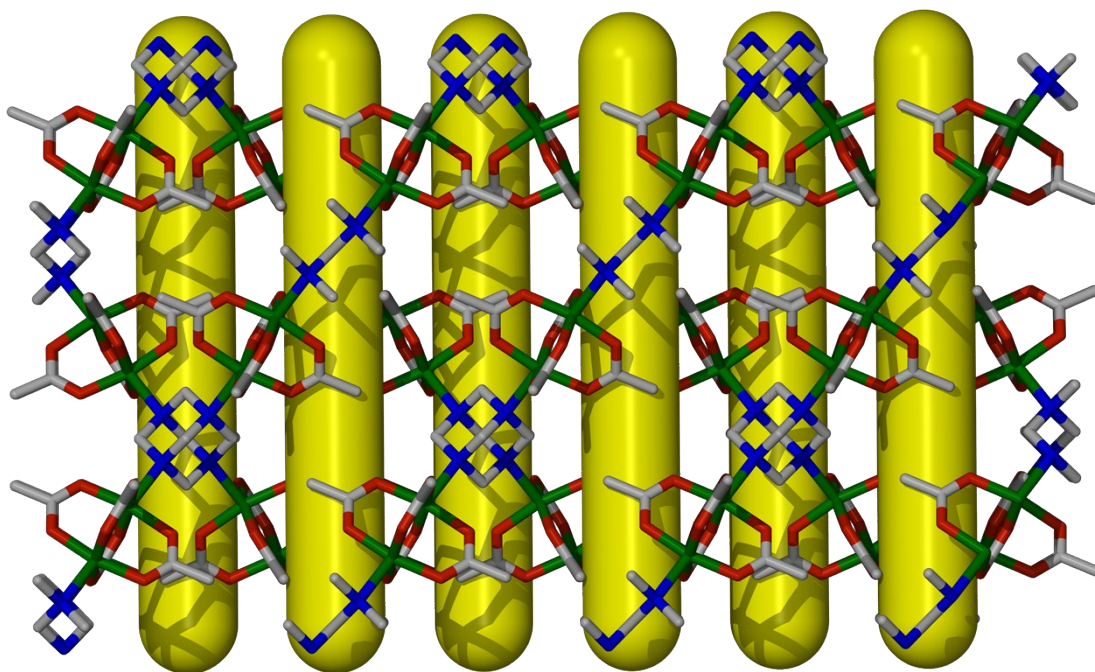

**Figure S6.** Displaying pores in the two-fold interpenetrated network of **1**. Yellow rods indicate the empty channels in **1**.

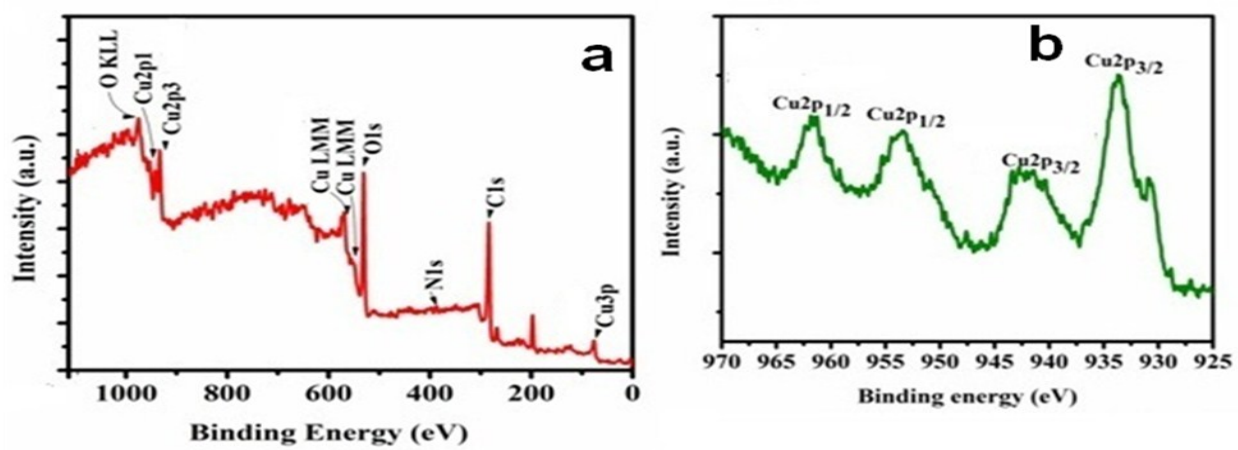

**Figure S7.** XPS spectra of compound **1** showing wide scan spectrum (a) and binding energies of Cu<sub>2</sub>p (b).

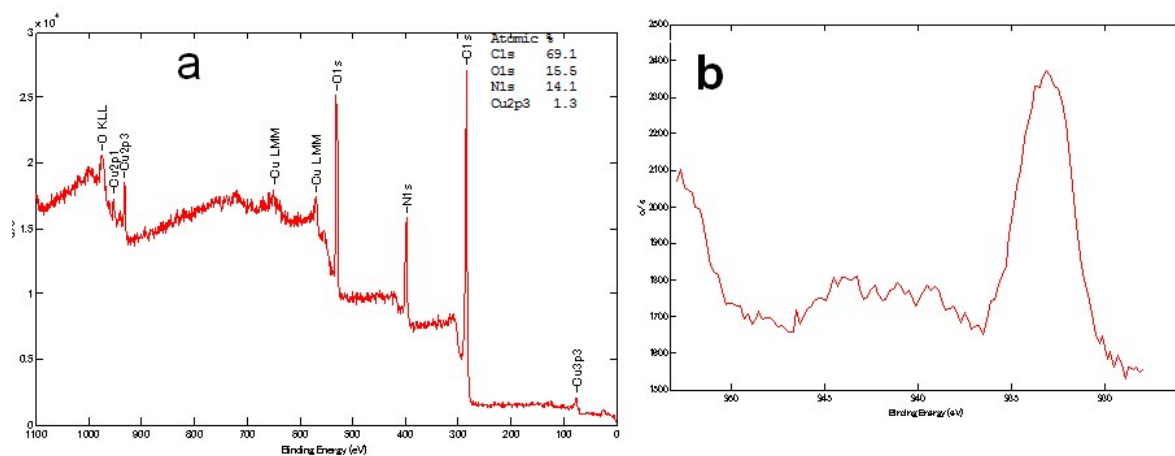

**Figure S8.** XPS spectra of compound **2** showing wide scan spectrum (a) and binding energies of Cu2p (b).

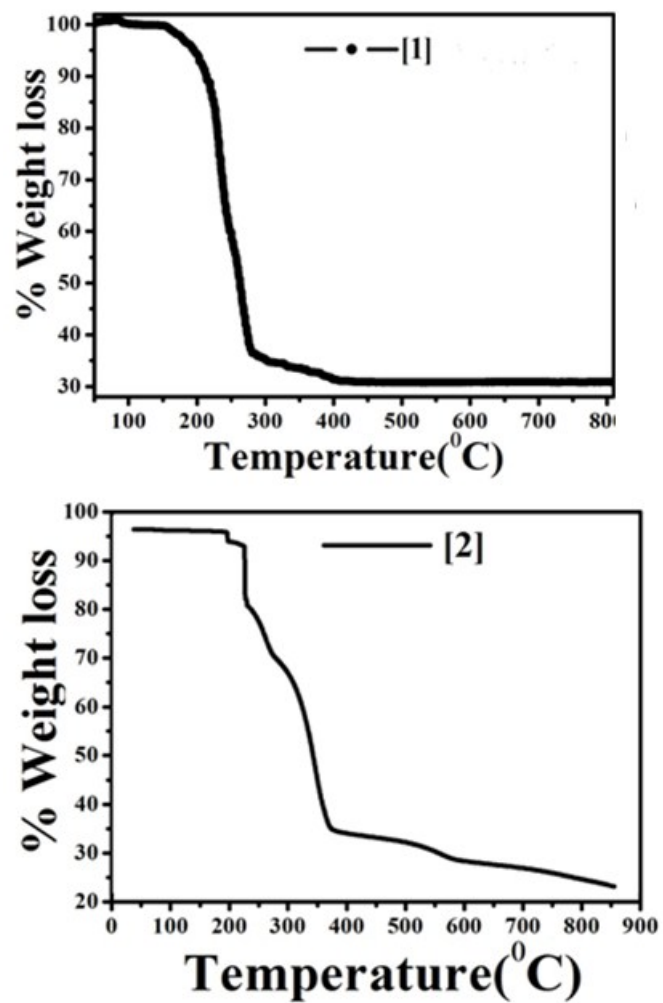

**Figure S9.** TGA profiles of  $[\text{Cu}_2(\text{OAc})_4(\mu_4\text{-hmt})_{0.5}]_n$  (**1**), and  $[\text{Cu}\{\text{C}_6\text{H}_4(\text{COO}^-)_2\}_2]_n \cdot 2\text{C}_9\text{H}_{14}\text{N}_3$  (**2**) recorded under nitrogen flow.

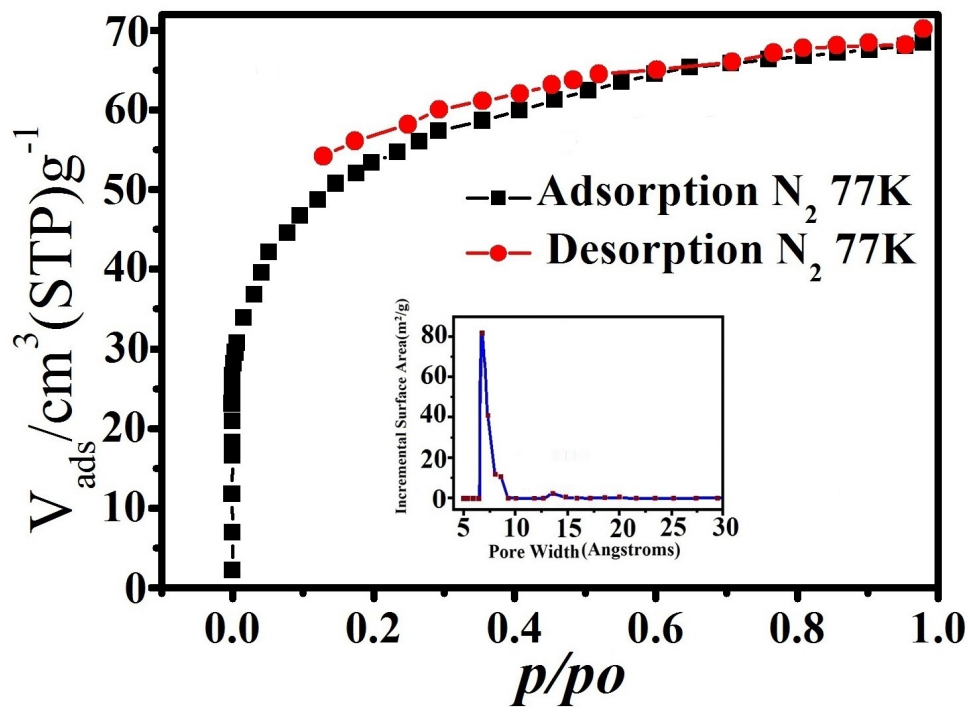

**Figure S10.**  $\text{N}_2$  adsorption and desorption isotherm at 77K and pore size distribution (inset) of 1.

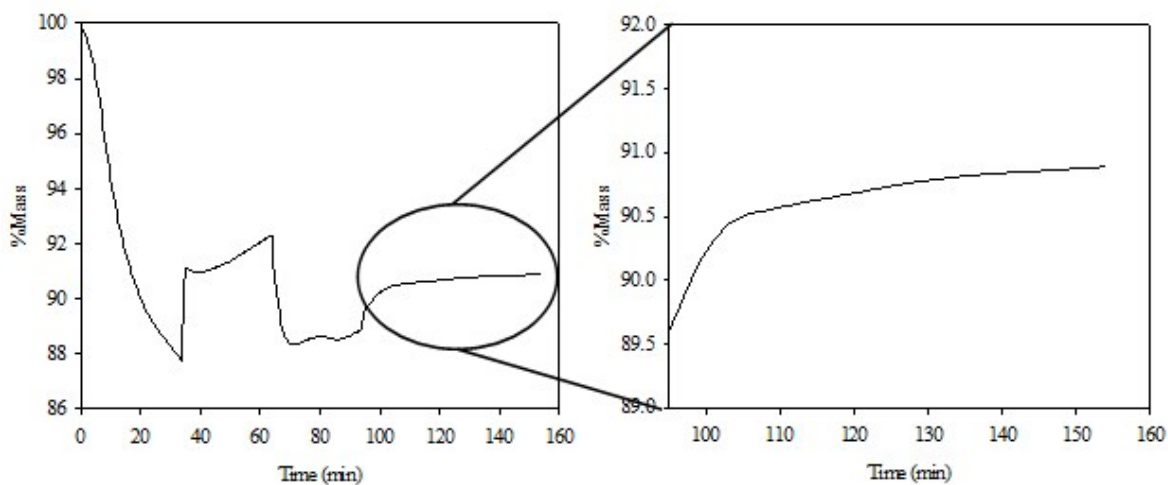

**Figure S11.** Kinetic studies for CO<sub>2</sub> capture (i) temperature profile, (ii) Compound 1.

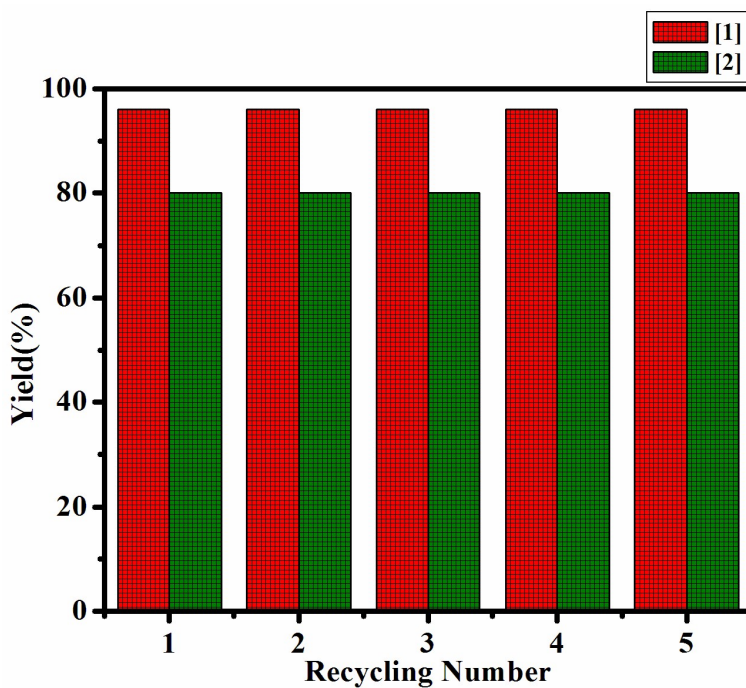

**Figure S12.** Histogram of recyclability study (five cycles) for catalytic activities of coordination polymers 1, and 2 in coupling of glycidol with CO<sub>2</sub>.



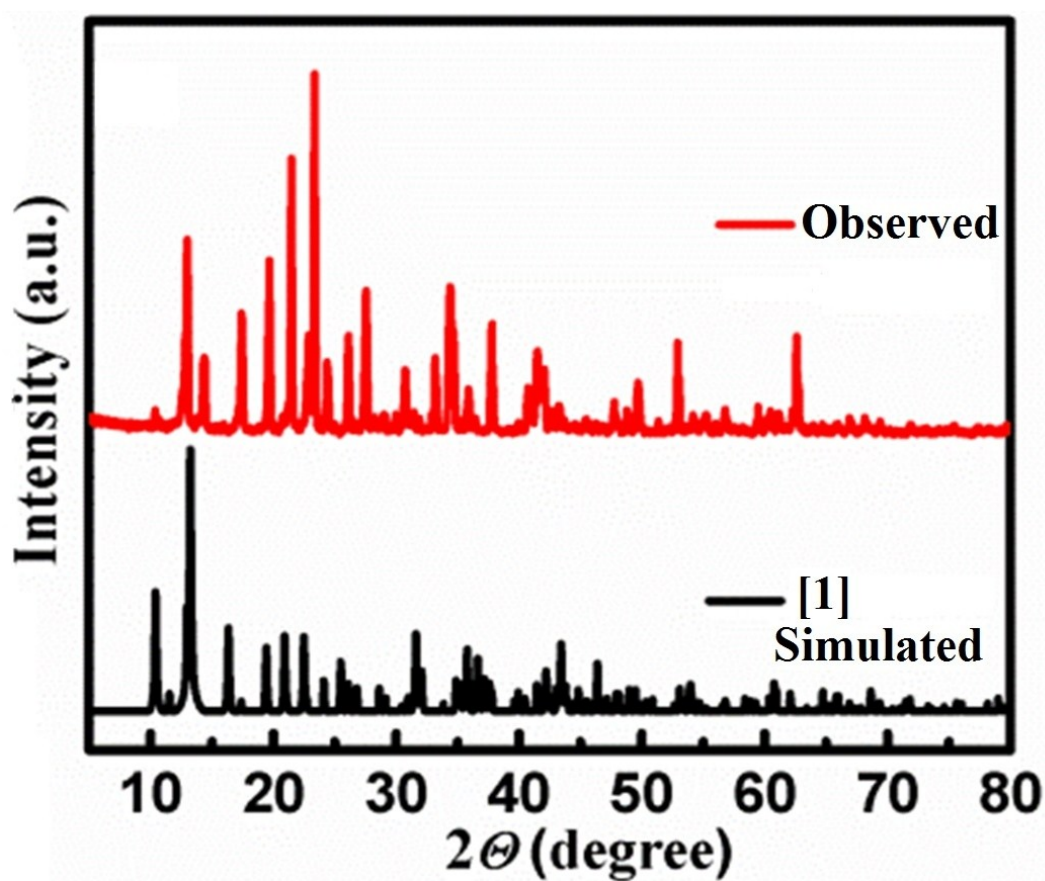

**Figure S13.** Powder XRD pattern of **1** after the catalytic reaction for coupling of glycidol with CO<sub>2</sub>. (Simulated = theoretical profile based on the structures determined by single-crystal XRD; Observed = experimental data).

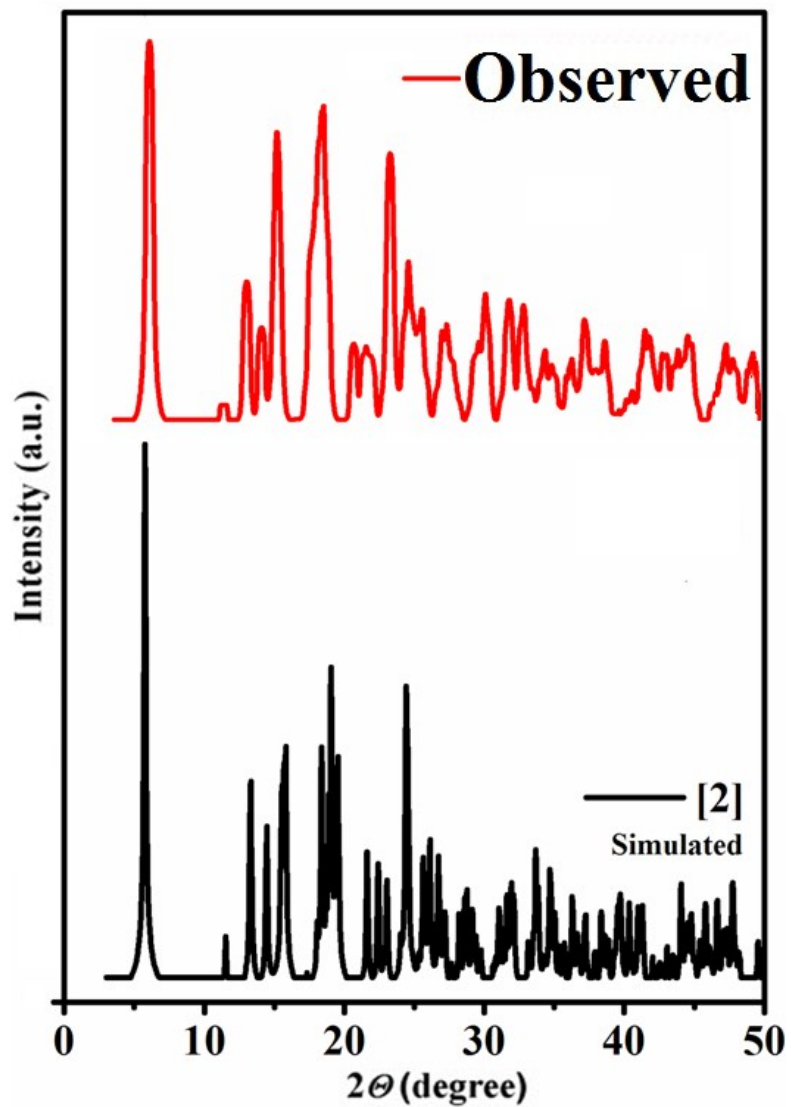

**Figure S14.** Powder XRD pattern of **2** after the catalytic reaction for coupling of glycidol with  $\text{CO}_2$  (Simulated = theoretical profile based on the structures determined by single-crystal XRD; Observed= experimental data).

**4-methyl-1,3-dioxolan-2-one:**

$^1\text{H}$  NMR (400 MHz,  $\text{CDCl}_3$ ):  $\delta$  1.49 (d,  $J=6.8$  Hz, 3H), 4.06 (t,  $J=4.5$  Hz, 1H), 4.73 (t,  $J=8.4$  Hz, 1H), 4.86-4.93 (m, 1H);  $^{13}\text{C}$  NMR (400 MHz,  $\text{CDCl}_3$ ): 19.15, 70.53, 73.48, 154.95; GC-MS (EI)  $m/z$  (%): 102 ( $\text{M}^+$ , 100).

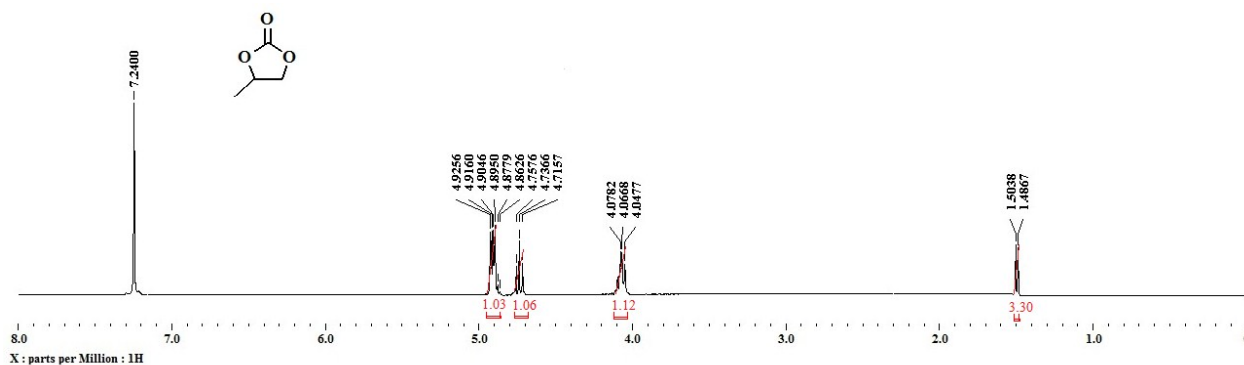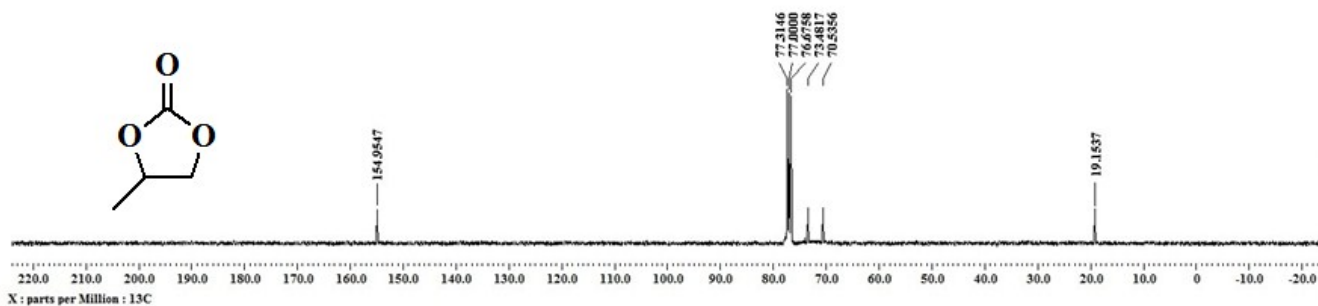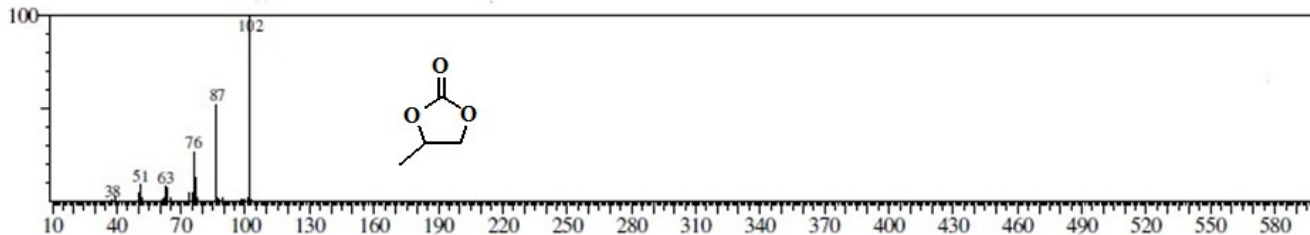

### 4-ethyl-1,3-dioxolan-2-one:

$^1\text{H}$  NMR (400 MHz,  $\text{CDCl}_3$ ):  $\delta$  1.04 (t,  $J=1.5\text{Hz}$ , 3H), 1.73-1.86 (m, 2H), 4.09 (t,  $J=8\text{Hz}$ , 1H), 4.53 (t,  $J=4.4\text{Hz}$ , 1H), 4.61 (q,  $J=3.6\text{Hz}$ , 1H);  $^{13}\text{C}$  NMR (400 MHz,  $\text{CDCl}_3$ ): 155.08, 76.40, 68.04, 26.67, 8.36; GC-MS (EI)  $m/z$  (%): 116 ( $\text{M}^+$ , 100).

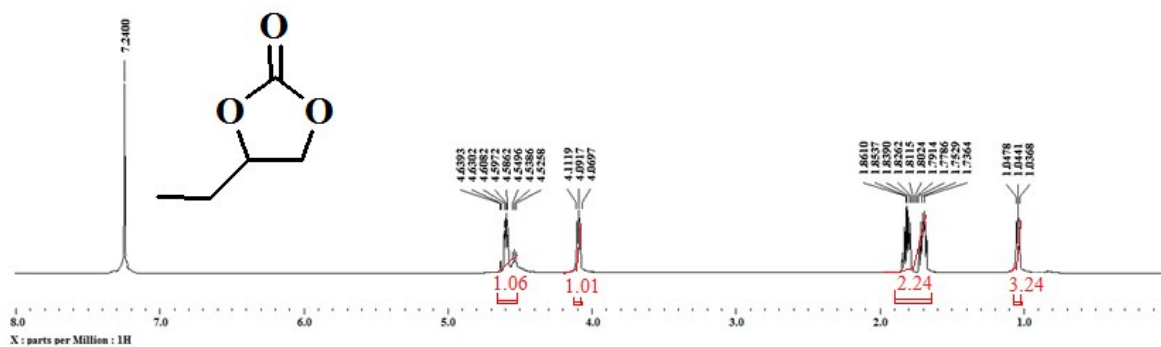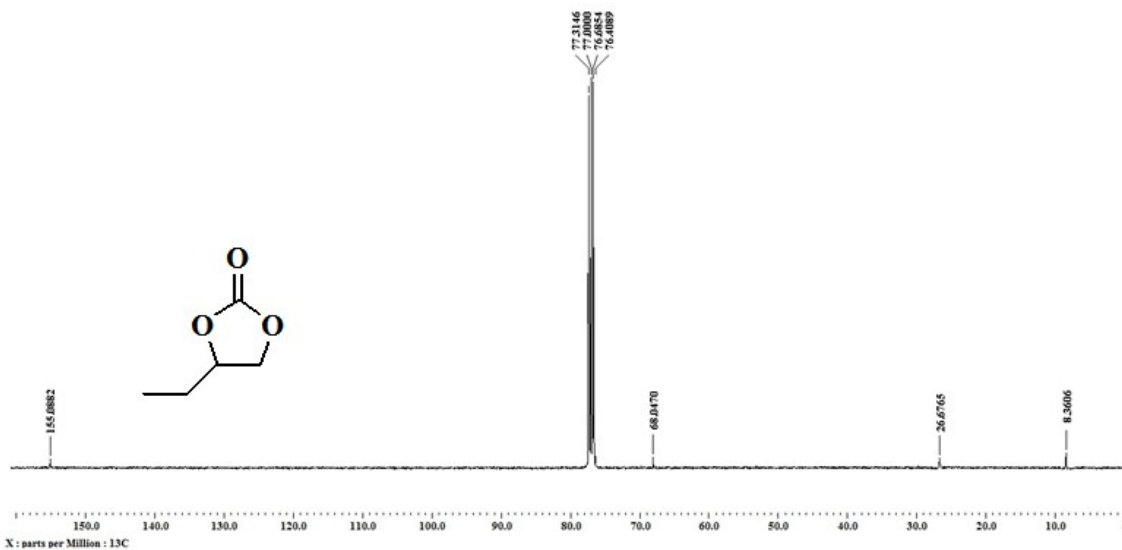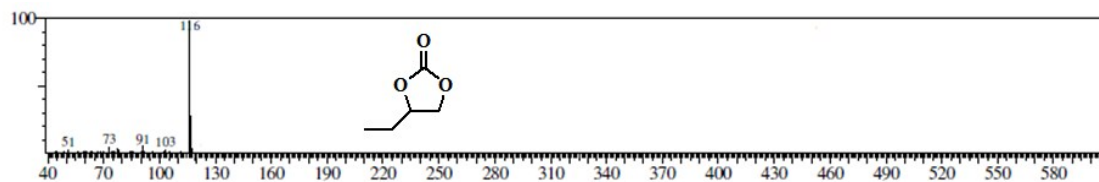

**4-(chloromethyl)-1, 3-dioxolan-2-one:**

$^1\text{H}$  NMR (400 MHz,  $\text{CDCl}_3$ ):  $\delta$  3.67-3.80 (m, 2H), 4.01 (dd,  $J = 3.6, 3.2$  Hz, 1H), 4.58 (t,  $J = 1.0$  Hz, 1H), 4.89-4.98 (m, 1H); ;  $^{13}\text{C}$  NMR (400 MHz,  $\text{CDCl}_3$ ): 43.83, 66.84, 75.48, 154.28; GC-MS (EI)  $m/z$  (%):137 ( $\text{M}^+$ , 100).

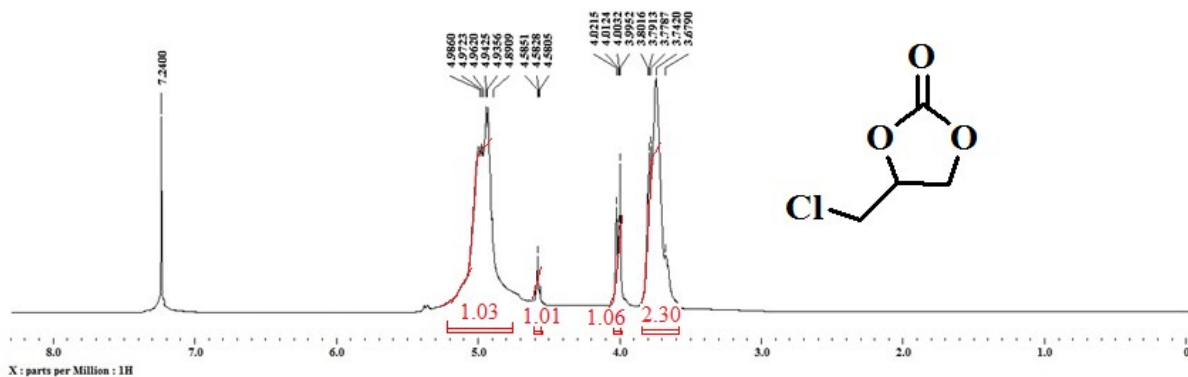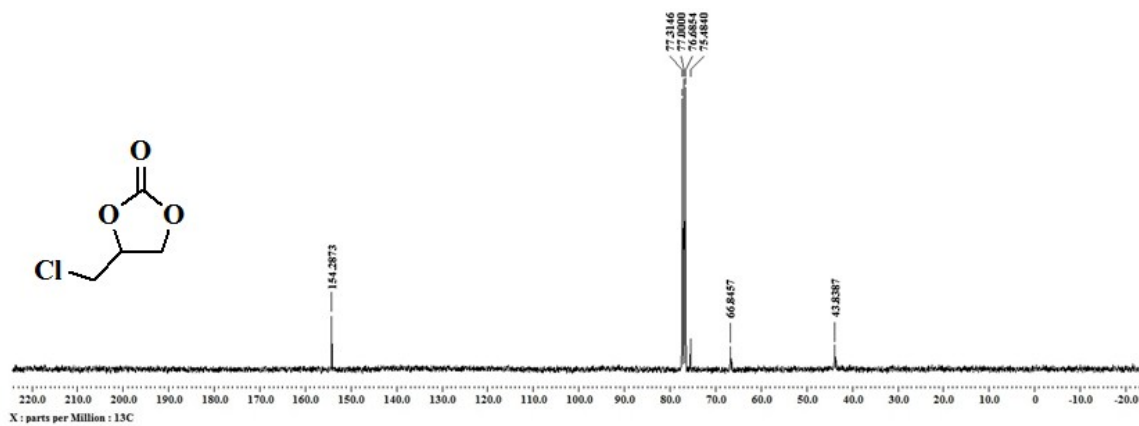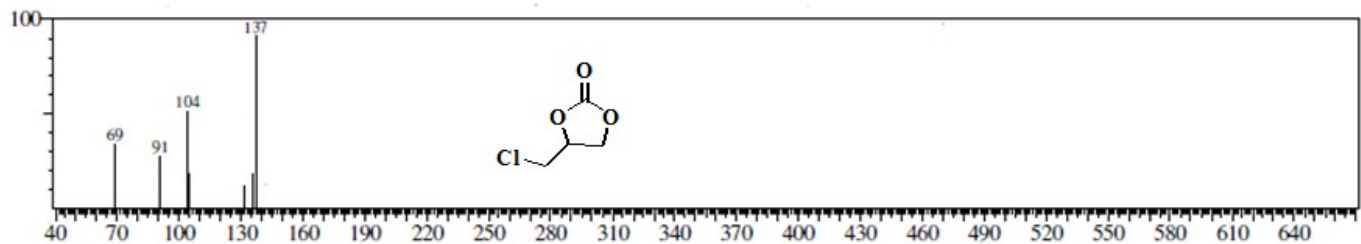

#### 4-(bromomethyl)-1,3-dioxolan-2-one:

$^1\text{H}$  NMR (400 MHz,  $\text{CDCl}_3$ ):  $\delta$  3.45-3.52 (m, 2H), 4.27-4.35 (dd,  $J = 13.7, 7.3$  Hz, 1H), 4.58 (t,  $J = 1.0$  Hz, 1H), 4.86-4.88 (m, 1H); ;  $^{13}\text{C}$  NMR (400 MHz,  $\text{CDCl}_3$ ): 31.32, 68.05, 73.92, 154.09; GC-MS (EI)  $m/z$  (%):181 ( $\text{M}^+$ , 100).

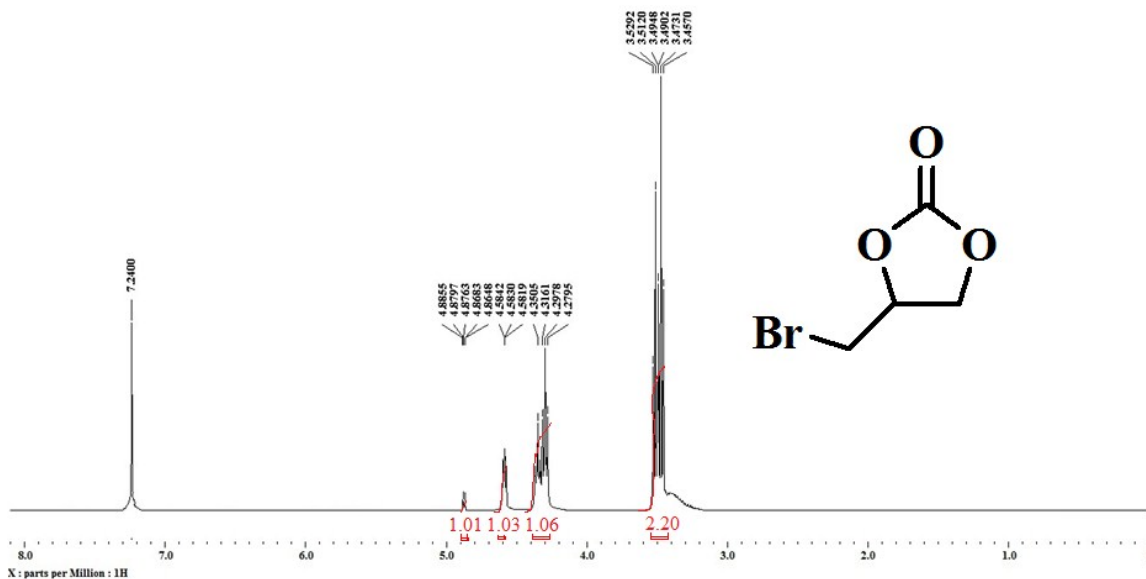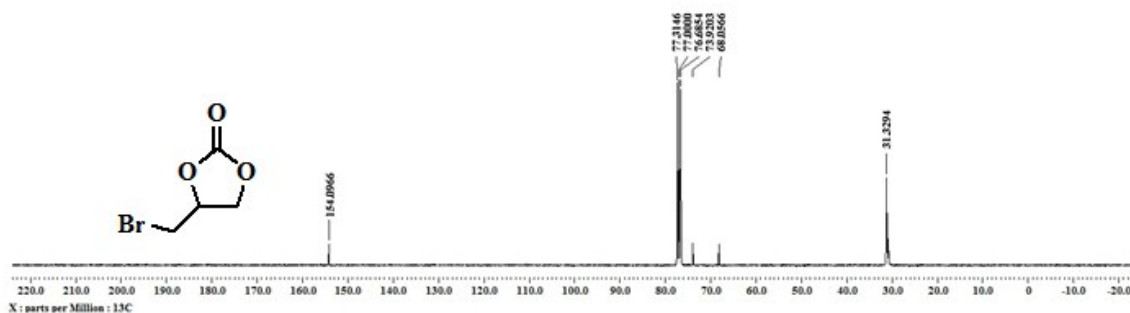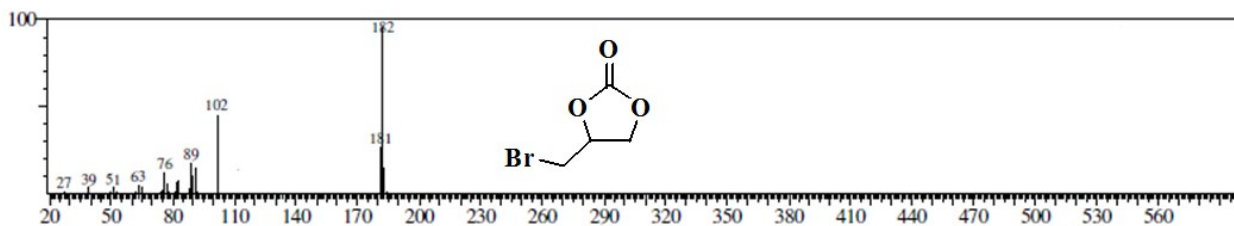

#### 4-(hydroxymethyl)-1,3-dioxolan-2-one:

<sup>1</sup>H NMR (400 MHz, CDCl<sub>3</sub>): δ 4.80-4.82 (m, 1H), 4.14-4.21 (m, 2H), 4.01-4.02 (m, 1H), 3.30-3.58 (m, 1H), 2.45-2.50 (m, 1H); <sup>13</sup>C NMR (400 MHz, CDCl<sub>3</sub>): 38.87, 39.08, 39.29, 39.50, 39.91, 40.41 , 60.61, 65.88, 155.20; GC-MS (EI) m/z (%): 118 (M<sup>+</sup>, 100).

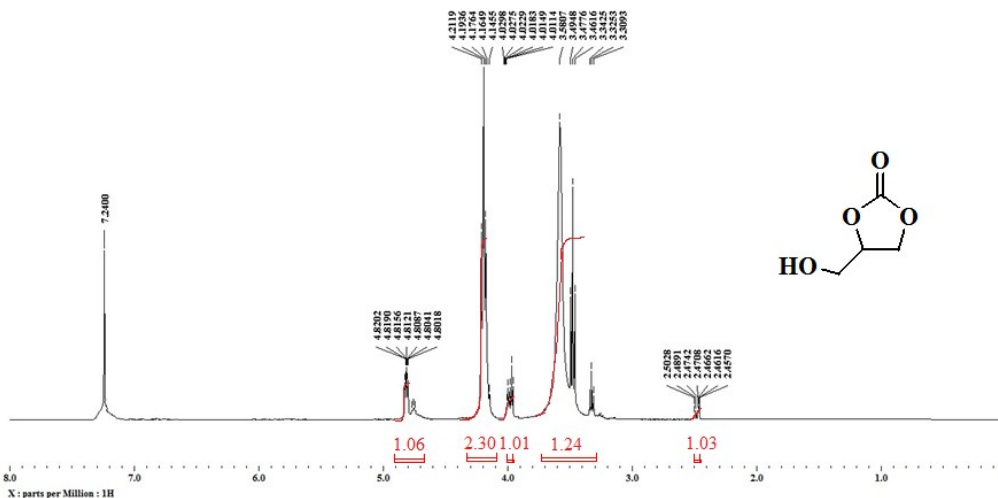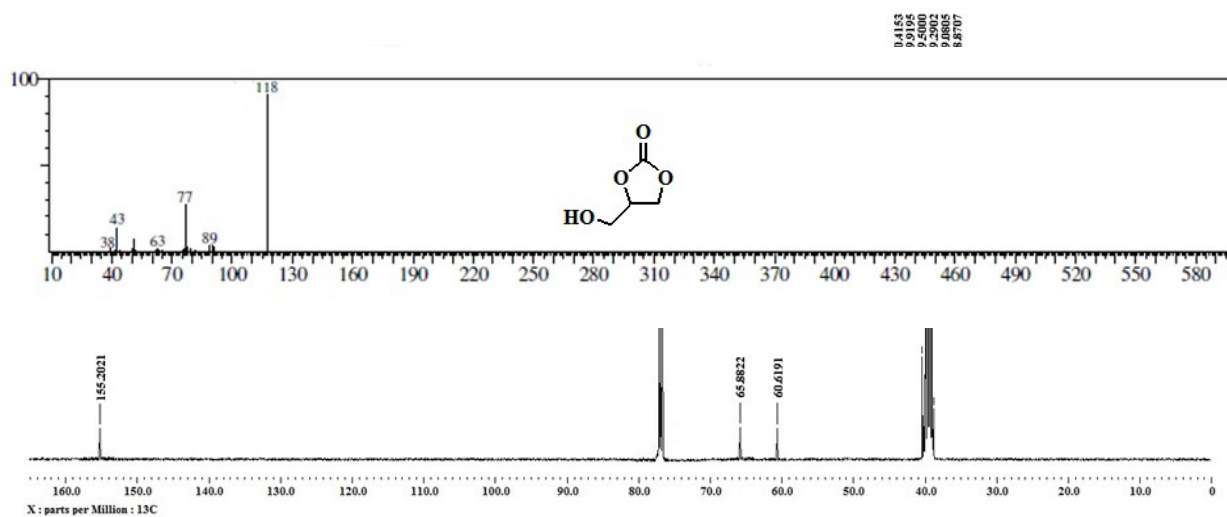

Supplement: c9dt01457h1.pdf [file c9dt01457h1.pdf]
